# Supplementary material for: Population-Scale Polymorphic Short Tandem Repeat Provides an Alternative Strategy for Allele Mining in Cotton
Source: Front Plant Sci. 2022 May 6;13:916830. doi: 10.3389/fpls.2022.916830 (PMC9120961; doi:10.3389/fpls.2022.916830)
Supplement: Supplementary file 10 [file Table_10.XLSX]

## Sheet: S11
Table S11. Promoter STRs associated with the expression of the genes.
STR position	Gene id	p value			Significance (< 0.05)
		0|0 vs 0|1	0|0 vs 1|1	0|1 vs 1|1
A01:70588	GH_A01G0013	0.87588	0.183008	0.47619	No significant
A01:95945	GH_A01G0018	/	0.96786	/	No significant
A01:353758	GH_A01G0048	/	0.815517	/	No significant
A01:730817	GH_A01G0091	0.57571	0.699174	0.755748	No significant
A01:730817	GH_A01G0092	0.096168	0.485423	0.404628	No significant
A01:2219103	GH_A01G0251	/	0.19867	/	No significant
A01:2654785	GH_A01G0304	0.261816	0.00389085	0.411765	Significant
A01:2869335	GH_A01G0328	0.774664	0.0556853	0.14177	No significant
A01:2869437	GH_A01G0328	1	0.140174	0.4	No significant
A01:3983680	GH_A01G0396	0.235264	0.868094	0.761905	No significant
A01:4231872	GH_A01G0410	0.702086	0.678756	0.338814	No significant
A01:5072830	GH_A01G0463	0.126163	0.52893	0.5	No significant
A01:5550078	GH_A01G0481	0.484848	0.792349	0.487695	No significant
A01:6147552	GH_A01G0510	/	0.079315	/	No significant
A01:6502813	GH_A01G0533	0.293741	0.0148083	0.4	Significant
A01:6541633	GH_A01G0536	1	0.727188	1	No significant
A01:6785256	GH_A01G0552	0.802139	0.30303	0.666667	No significant
A01:6785256	GH_A01G0553	0.431373	0.848485	0.666667	No significant
A01:6883023	GH_A01G0562	0.263158	0.669055	0.571429	No significant
A01:18309366	GH_A01G0986	0.164645	0.305943	0.4	No significant
A01:18510096	GH_A01G0991	0.8	0.17778	0.666667	No significant
A01:18953314	GH_A01G1006	0.418279	/	/	No significant
A01:20569764	GH_A01G1064	0.00336134	0.291622	0.228571	Significant
A01:21198832	GH_A01G1083	0.0689655	0.134908	0.444444	No significant
A01:31770090	GH_A01G1222	0.49314	0.49314	/	No significant
A01:34068743	GH_A01G1253	0.682593	0.353537	0.4	No significant
A01:41391440	GH_A01G1296	0.697585	0.322171	0.4	No significant
A01:41391775	GH_A01G1296	0.529015	0.808907	1	No significant
A01:54525806	GH_A01G1406	0.701726	/	/	No significant
A01:62196689	GH_A01G1444	1	0.443902	0.533333	No significant
A01:73908844	GH_A01G1524	0.666667	0.227145	0.8	No significant
A01:91814087	GH_A01G1644	0.967742	0.537903	0.8	No significant
A01:93347955	GH_A01G1665	0.361571	0.816493	0.543083	No significant
A01:97753587	GH_A01G1710	0.449507	0.199109	0.0807896	No significant
A01:106027639	GH_A01G1799	/	0.900606	/	No significant
A01:106183713	GH_A01G1806	0.8	0.212001	0.5	No significant
A01:108040655	GH_A01G1878	0.195122	0.115415	0.857143	No significant
A01:108596612	GH_A01G1913	/	0.372672	/	No significant
A01:111301098	GH_A01G2035	0.1284	0.695899	0.2	No significant
A01:111710917	GH_A01G2048	0.0744429	0.888889	0.5	No significant
A01:111855985	GH_A01G2056	0.0462535	0.0555042	0.333333	Significant
A01:112363451	GH_A01G2078	0.913864	0.901969	1	No significant
A01:114001641	GH_A01G2178	0.114286	0.800894	0.4	No significant
A01:114005144	GH_A01G2179	0.869043	0.418279	0.628571	No significant
A01:115757145	GH_A01G2259	0.136364	0.163241	0.5	No significant
A01:117096226	GH_A01G2397	/	0.507508	/	No significant
A01:117759107	GH_A01G2460	0.571429	0.832396	0.61118	No significant
A02:112810	GH_A02G0013	0.79872	0.00198188	0.49697	Significant
A02:288641	GH_A02G0043	0.257928	0.0930233	0.8	No significant
A02:1118374	GH_A02G0124	0.0122436	0.25025	0.198134	Significant
A02:3188450	GH_A02G0299	0.63467	0.70153	0.461846	No significant
A02:3387829	GH_A02G0314	/	0.0643796	/	No significant
A02:3387830	GH_A02G0314	/	0.312147	/	No significant
A02:3387831	GH_A02G0314	/	0.122906	/	No significant
A02:3820285	GH_A02G0360	0.967742	0.24086	0.333333	No significant
A02:4001001	GH_A02G0376	/	0.877377	/	No significant
A02:5188376	GH_A02G0447	0.714286	0.8	1	No significant
A02:6694889	GH_A02G0511	0.705882	0.617331	0.666667	No significant
A02:6694900	GH_A02G0511	0.761905	0.954929	0.615385	No significant
A02:8832454	GH_A02G0625	0.711719	0.480797	0.533333	No significant
A02:9553090	GH_A02G0660	0.170213	0.616804	0.4	No significant
A02:17977398	GH_A02G0859	0.553191	0.723404	1	No significant
A02:32758215	GH_A02G0998	0.1	0.425087	0.5	No significant
A02:44529266	GH_A02G1106	0.20592	0.357294	0.2	No significant
A02:46168676	GH_A02G1143	/	0.632523	/	No significant
A02:48066944	GH_A02G1172	0.108527	0.802591	0.133333	No significant
A02:58742809	GH_A02G1279	0.605268	0.579346	1	No significant
A02:73325878	GH_A02G1314	0.542553	0.897163	0.666667	No significant
A02:82828521	GH_A02G1374	0.347059	0.19888	0.7	No significant
A02:98311590	GH_A02G1544	/	0.668179	/	No significant
A02:98905278	GH_A02G1558	/	0.566042	/	No significant
A02:105607043	GH_A02G1796	0.727273	0.181818	0.666667	No significant
A02:107885394	GH_A02G2010	1	0.569913	0.549451	No significant
A02:108007318	GH_A02G2035	0.820769	0.0513234	0.545614	No significant
A02:108091697	GH_A02G2048	0.93617	/	/	No significant
A02:108143060	GH_A02G2058	/	0.460453	/	No significant
A03:38244	GH_A03G0005	0.164502	0.179607	0.00171887	Significant
A03:3671137	GH_A03G0295	0.81085	0.670968	0.533333	No significant
A03:3671153	GH_A03G0295	0.0571429	0.577778	0.666667	No significant
A03:4140252	GH_A03G0327	/	0.405012	/	No significant
A03:4362290	GH_A03G0342	0.214866	0.678771	0.212885	No significant
A03:4547693	GH_A03G0357	/	0.945403	/	No significant
A03:5917829	GH_A03G0436	0.869565	0.543888	1	No significant
A03:6106786	GH_A03G0443	0.757895	0.610484	0.843011	No significant
A03:7016250	GH_A03G0482	0.569801	0.80593	0.333333	No significant
A03:7262865	GH_A03G0495	0.436364	0.893115	0.703993	No significant
A03:7600682	GH_A03G0514	/	0.162289	/	No significant
A03:8183497	GH_A03G0540	0.918919	0.0368312	0.8	Significant
A03:8215899	GH_A03G0543	0.628205	0.35868	0.95336	No significant
A03:8454391	GH_A03G0557	0.767677	0.726903	0.8	No significant
A03:8888477	GH_A03G0569	0.501422	0.833333	0.5	No significant
A03:9486041	GH_A03G0600	0.137981	0.465801	0.131543	No significant
A03:9733233	GH_A03G0607	0.5	0.723833	0.727273	No significant
A03:14481919	GH_A03G0737	/	0.65641	/	No significant
A03:19482950	GH_A03G0861	/	0.143965	/	No significant
A03:22548688	GH_A03G0895	0.434783	0.193237	0.333333	No significant
A03:66560132	GH_A03G1211	/	0.774713	/	No significant
A03:85736734	GH_A03G1393	/	0.376118	/	No significant
A03:85753274	GH_A03G1394	0.319799	0.139458	0.190476	No significant
A03:91155691	GH_A03G1477	0.5	0.15	1	No significant
A03:91155707	GH_A03G1477	0.653061	/	/	No significant
A03:91904585	GH_A03G1489	/	0.0930233	/	No significant
A03:95657423	GH_A03G1568	0.702703	0.878143	1	No significant
A03:97514129	GH_A03G1602	1	0.0340538	0.4	Significant
A03:102015558	GH_A03G1720	0.714738	0.0280843	0.0233304	Significant
A03:102999063	GH_A03G1750	0.275862	0.454049	0.25	No significant
A03:102999063	GH_A03G1751	0.413793	0.701525	0.25	No significant
A03:103995542	GH_A03G1797	0.666667	0.56385	1	No significant
A03:106530873	GH_A03G1931	0.589163	0.179714	0.825175	No significant
A03:106884175	GH_A03G1953	0.397387	0.1	0.5	No significant
A03:108699537	GH_A03G2085	/	1	/	No significant
A03:109570798	GH_A03G2163	0.670817	0.385216	0.47619	No significant
A03:110673933	GH_A03G2303	0.432432	0.713477	0.666667	No significant
A03:110972010	GH_A03G2350	0.380488	0.227064	0.8	No significant
A03:111514591	GH_A03G2444	/	0.92674	/	No significant
A04:263607	GH_A04G0028	0.106939	0.494361	0.443044	No significant
A04:263607	GH_A04G0029	0.926634	0.141537	0.138433	No significant
A04:1338709	GH_A04G0104	/	0.972973	/	No significant
A04:2395843	GH_A04G0164	0.666667	0.891209	0.666667	No significant
A04:2463741	GH_A04G0167	0.416281	0.869565	0.666667	No significant
A04:3541747	GH_A04G0219	0.726557	0.691812	0.385283	No significant
A04:4663756	GH_A04G0251	/	0.117266	/	No significant
A04:5380823	GH_A04G0288	0.289516	0.972613	1	No significant
A04:5566648	GH_A04G0293	0.0833333	0.699135	0.133333	No significant
A04:9109463	GH_A04G0438	0.263158	0.675138	0.25974	No significant
A04:9496652	GH_A04G0455	/	0.393551	/	No significant
A04:20561365	GH_A04G0616	0.691478	0.918919	0.857143	No significant
A04:51310385	GH_A04G0789	0.784615	0.615385	0.666667	No significant
A04:71342681	GH_A04G1003	0.962963	0.207249	0.512821	No significant
A04:74293522	GH_A04G1055	/	0.538304	/	No significant
A04:74745598	GH_A04G1067	/	0.830769	/	No significant
A04:76327388	GH_A04G1102	0.000222946	0.308893	0.0147248	Significant
A04:76821930	GH_A04G1116	1	0.87588	0.8	No significant
A04:77978470	GH_A04G1152	0.443548	0.146326	0.133333	No significant
A04:78579197	GH_A04G1177	/	0.612385	/	No significant
A04:80214636	GH_A04G1223	/	0.394728	/	No significant
A04:81017657	GH_A04G1249	/	0.616804	/	No significant
A04:82072655	GH_A04G1288	0.378788	0.964668	0.571429	No significant
A04:82872718	GH_A04G1332	/	0.79531	/	No significant
A04:83068647	GH_A04G1344	0.589544	0.974861	1	No significant
A04:83109207	GH_A04G1346	/	0.817449	/	No significant
A04:84544754	GH_A04G1445	0.384727	0.26036	0.897243	No significant
A04:84997125	GH_A04G1483	0.670817	/	/	No significant
A04:85202749	GH_A04G1505	0.54878	0.31706	0.428571	No significant
A04:85499386	GH_A04G1533	0.443975	0.651163	1	No significant
A05:80464	GH_A05G0003	/	0.645599	/	No significant
A05:413197	GH_A05G0023	0.0555556	0.985668	0.285714	No significant
A05:1970937	GH_A05G0210	/	0.447497	/	No significant
A05:2390002	GH_A05G0253	/	0.320732	/	No significant
A05:2841324	GH_A05G0292	/	0.530792	/	No significant
A05:3464295	GH_A05G0366	0.714286	0.00772896	0.380952	Significant
A05:3742432	GH_A05G0397	1	0.192479	0.574436	No significant
A05:4606045	GH_A05G0502	0.375533	0.744436	0.533333	No significant
A05:5019300	GH_A05G0538	0.475838	0.143461	0.4	No significant
A05:5577032	GH_A05G0610	0.553096	0.150905	0.785714	No significant
A05:5816538	GH_A05G0644	0.614697	0.170693	0.606394	No significant
A05:5973867	GH_A05G0666	0.497391	0.0573405	0.281818	No significant
A05:6023962	GH_A05G0672	/	0.286596	/	No significant
A05:6199820	GH_A05G0692	/	0.514798	/	No significant
A05:6231728	GH_A05G0695	/	0.406203	/	No significant
A05:6877280	GH_A05G0767	0.714286	0.238095	1	No significant
A05:8984380	GH_A05G1009	/	0.548975	/	No significant
A05:8984380	GH_A05G1010	/	0.000496354	/	Significant
A05:9378276	GH_A05G1056	0.764706	0.374811	0.4	No significant
A05:9555994	GH_A05G1071	0.825911	0.263158	0.666667	No significant
A05:9555994	GH_A05G1072	0.974359	0.526316	0.666667	No significant
A05:9584985	GH_A05G1074	0.162162	0.773826	0.666667	No significant
A05:10684711	GH_A05G1174	/	0.780027	/	No significant
A05:10848521	GH_A05G1193	/	0.550435	/	No significant
A05:11646613	GH_A05G1282	0.743704	0.576923	0.888889	No significant
A05:13051628	GH_A05G1426	0.691555	0.68932	1	No significant
A05:13124709	GH_A05G1433	0.731707	0.492806	1	No significant
A05:13232182	GH_A05G1444	/	0.985631	/	No significant
A05:13477853	GH_A05G1471	0.967742	0.0747801	0.5	No significant
A05:13510107	GH_A05G1473	0.396396	0.112485	0.8	No significant
A05:13910518	GH_A05G1503	0.454559	0.454559	/	No significant
A05:14085830	GH_A05G1520	0.291756	0.715832	0.180569	No significant
A05:16083045	GH_A05G1692	/	0.576956	/	No significant
A05:16215042	GH_A05G1712	0.896552	0.794216	0.836601	No significant
A05:16215697	GH_A05G1712	0.979386	0.712308	0.460606	No significant
A05:16241199	GH_A05G1717	0.378378	0.145654	0.142857	No significant
A05:16405827	GH_A05G1740	0.382764	0.145613	0.900357	No significant
A05:16541124	GH_A05G1761	0.470588	0.157341	0.596059	No significant
A05:16727269	GH_A05G1793	0.524291	/	/	No significant
A05:16801093	GH_A05G1803	/	0.854569	/	No significant
A05:16833716	GH_A05G1807	1	/	/	No significant
A05:17933529	GH_A05G1899	/	0.598894	/	No significant
A05:18512712	GH_A05G1951	0.322581	0.598401	0.333333	No significant
A05:19194420	GH_A05G2004	0.378378	0.529817	1	No significant
A05:19233163	GH_A05G2009	0.343465	0.744681	0.4	No significant
A05:19413304	GH_A05G2026	/	0.399801	/	No significant
A05:20096114	GH_A05G2096	0.211416	0.321635	1	No significant
A05:20134831	GH_A05G2101	0.34599	0.527694	0.4	No significant
A05:20689108	GH_A05G2156	0.316792	0.66649	0.227275	No significant
A05:21369375	GH_A05G2208	0.333333	0.27235	0.137931	No significant
A05:21373211	GH_A05G2209	0.378378	0.2079	1	No significant
A05:23022647	GH_A05G2335	0.83871	0.864553	0.75	No significant
A05:26005495	GH_A05G2498	0.211073	0.0831248	0.222222	No significant
A05:26166356	GH_A05G2513	0.772038	0.635811	0.662338	No significant
A05:26706739	GH_A05G2548	0.673499	0.673499	/	No significant
A05:27168469	GH_A05G2578	0.9	0.758774	0.666667	No significant
A05:27358865	GH_A05G2590	/	0.376248	/	No significant
A05:27365925	GH_A05G2591	/	0.171247	/	No significant
A05:27943473	GH_A05G2628	0.371229	0.451836	1	No significant
A05:28206501	GH_A05G2642	0.734571	0.17274	0.190476	No significant
A05:28644883	GH_A05G2670	/	0.921764	/	No significant
A05:28842061	GH_A05G2681	/	0.637578	/	No significant
A05:29314444	GH_A05G2707	0.0500125	7.9e-05	0.015873	Significant
A05:30781001	GH_A05G2775	0.897447	0.718087	0.958824	No significant
A05:34144991	GH_A05G2900	/	0.0135628	/	Significant
A05:34144991	GH_A05G2901	/	0.961538	/	No significant
A05:39230642	GH_A05G3060	/	0.375713	/	No significant
A05:46349562	GH_A05G3185	0.342857	0.438867	0.5	No significant
A05:47036421	GH_A05G3205	0.969697	0.53653	0.641026	No significant
A05:73852299	GH_A05G3394	/	0.512379	/	No significant
A05:82420436	GH_A05G3507	0.843015	0.429545	0.701238	No significant
A05:84699678	GH_A05G3558	/	0.745423	/	No significant
A05:88569115	GH_A05G3620	0.230162	0.61983	0.714286	No significant
A05:97201731	GH_A05G3702	1	0.378801	0.8	No significant
A05:98666952	GH_A05G3753	/	0.2556	/	No significant
A05:100943438	GH_A05G3836	0.113884	0.650058	0.0407468	Significant
A05:100943446	GH_A05G3836	0.0925604	0.506549	0.0655705	No significant
A05:102231832	GH_A05G3892	0.971429	0.827165	0.816667	No significant
A05:102890937	GH_A05G3932	0.634928	0.293932	0.97094	No significant
A05:104991953	GH_A05G4007	0.355123	0.017731	0.638803	Significant
A05:105378755	GH_A05G4027	0.162891	0.965116	0.571429	No significant
A05:108185157	GH_A05G4181	1	0.665373	0.71049	No significant
A05:108839200	GH_A05G4211	0.79872	0.630631	0.8	No significant
A05:109377671	GH_A05G4254	0.0413969	0.73913	0.5	Significant
A05:110337421	GH_A05G4337	/	0.181359	/	No significant
A06:942411	GH_A06G0101	0.611111	0.216216	1	No significant
A06:1093600	GH_A06G0119	0.910785	1	1	No significant
A06:2025712	GH_A06G0199	0.925641	0.211461	0.857143	No significant
A06:2786617	GH_A06G0268	0.825806	0.746666	0.669173	No significant
A06:2786618	GH_A06G0268	0.875195	0.675458	0.650649	No significant
A06:4850313	GH_A06G0397	/	0.946439	/	No significant
A06:6987729	GH_A06G0478	0.166667	0.516614	0.8	No significant
A06:6987729	GH_A06G0479	0.166667	0.0825765	0.4	No significant
A06:7531736	GH_A06G0500	0.855615	0.594958	1	No significant
A06:15096644	GH_A06G0697	/	0.132217	/	No significant
A06:15996217	GH_A06G0729	0.682788	0.373783	0.8	No significant
A06:16566920	GH_A06G0757	0.806339	0.0408163	0.5	Significant
A06:17071230	GH_A06G0776	0.146341	0.594657	1	No significant
A06:22710773	GH_A06G0882	0.390945	0.379539	0.927273	No significant
A06:27355155	GH_A06G0924	0.820062	0.670225	0.493644	No significant
A06:27901020	GH_A06G0938	0.413793	0.0314229	0.25	Significant
A06:30164097	GH_A06G0966	0.465116	0.290153	0.285714	No significant
A06:46879858	GH_A06G1135	0.640089	0.285714	1	No significant
A06:49734918	GH_A06G1150	0.551724	0.346433	0.666667	No significant
A06:68803238	GH_A06G1267	/	0.334495	/	No significant
A06:78096099	GH_A06G1354	0.684211	0.25081	0.5	No significant
A06:91987487	GH_A06G1465	/	0.585884	/	No significant
A06:98580970	GH_A06G1508	0.1	0.70767	0.222222	No significant
A06:109049315	GH_A06G1611	0.3	0.00745667	0.333333	Significant
A06:109349705	GH_A06G1617	0.601585	0.609761	1	No significant
A06:111921590	GH_A06G1669	0.969697	0.99014	1	No significant
A06:115448274	GH_A06G1723	0.518519	0.857921	0.666667	No significant
A06:115551898	GH_A06G1731	0.0454055	0.281059	0.0559674	Significant
A06:116699537	GH_A06G1763	0.216216	0.106003	0.142857	No significant
A06:121924810	GH_A06G2008	0.15922	0.860504	0.428571	No significant
A06:123116700	GH_A06G2073	/	0.469902	/	No significant
A06:123207452	GH_A06G2079	0.818835	0.913905	0.858573	No significant
A06:124140059	GH_A06G2137	0.803512	0.357586	1	No significant
A06:124902334	GH_A06G2203	0.411129	0.0487813	0.689459	Significant
A06:124902335	GH_A06G2203	0.444289	0.165526	0.635911	No significant
A06:125760169	GH_A06G2300	0.424242	0.128342	0.666667	No significant
A06:125760305	GH_A06G2300	/	0.832825	/	No significant
A06:125760169	GH_A06G2301	0.363636	0.969697	0.666667	No significant
A06:125760305	GH_A06G2301	/	0.883804	/	No significant
A06:125970935	GH_A06G2326	1	0.714697	0.767832	No significant
A06:126174645	GH_A06G2363	0.487805	0.30662	1	No significant
A07:140242	GH_A07G0011	0.647059	0.829412	0.5	No significant
A07:140242	GH_A07G0012	0.0588235	0.377311	0.5	No significant
A07:146724	GH_A07G0013	/	0.406359	/	No significant
A07:383083	GH_A07G0038	0.784615	0.986706	0.857143	No significant
A07:1375102	GH_A07G0132	/	0.0878049	/	No significant
A07:2543250	GH_A07G0252	0.745938	0.553149	1	No significant
A07:2625048	GH_A07G0261	0.75	0.45	1	No significant
A07:2953679	GH_A07G0290	0.677526	0.333459	0.261905	No significant
A07:3447509	GH_A07G0342	/	0.612183	/	No significant
A07:3447528	GH_A07G0342	0.96	0.739565	1	No significant
A07:3677351	GH_A07G0362	1	0.575572	0.941176	No significant
A07:4234982	GH_A07G0411	0.668474	0.702868	1	No significant
A07:4577619	GH_A07G0434	0.6	0.782404	1	No significant
A07:5923556	GH_A07G0545	/	0.401932	/	No significant
A07:6780801	GH_A07G0616	/	0.20202	/	No significant
A07:6980616	GH_A07G0626	/	0.983891	/	No significant
A07:7912569	GH_A07G0684	0.833333	0.55102	1	No significant
A07:8063883	GH_A07G0691	0.424273	0.918978	0.690476	No significant
A07:9080565	GH_A07G0761	0.191697	0.793282	0.201581	No significant
A07:9532533	GH_A07G0782	0.120375	0.473636	0.4	No significant
A07:10517973	GH_A07G0841	0.76999	1	0.660806	No significant
A07:12400745	GH_A07G0927	0.38971	0.591614	0.602679	No significant
A07:16369332	GH_A07G1074	0.396396	/	/	No significant
A07:16778697	GH_A07G1099	0.736326	0.273775	0.711902	No significant
A07:16778697	GH_A07G1100	0.317098	0.803063	0.316423	No significant
A07:19010986	GH_A07G1189	/	0.324324	/	No significant
A07:19758292	GH_A07G1211	1	0.945633	0.732026	No significant
A07:19798428	GH_A07G1213	0.215789	0.181577	0.615789	No significant
A07:20601756	GH_A07G1242	0.0360963	/	/	Significant
A07:23432032	GH_A07G1330	0.0848485	0.590956	0.0563725	No significant
A07:23433676	GH_A07G1330	0.416667	0.835141	0.217391	No significant
A07:24205832	GH_A07G1351	0.2521	0.274321	0.237524	No significant
A07:25322821	GH_A07G1381	1	0.314183	0.5	No significant
A07:25643108	GH_A07G1389	0.262366	0.144125	1	No significant
A07:25643168	GH_A07G1389	0.63508	0.111445	0.368132	No significant
A07:28419129	GH_A07G1468	/	0.326484	/	No significant
A07:31889384	GH_A07G1547	0.310191	0.914286	0.857143	No significant
A07:32883133	GH_A07G1572	/	0.280788	/	No significant
A07:43267278	GH_A07G1693	0.331126	0.332241	0.945182	No significant
A07:63514792	GH_A07G1861	0.97561	0.878049	1	No significant
A07:80072931	GH_A07G1981	0.5	0.0101378	1	Significant
A07:87671406	GH_A07G2140	0.5	1	1	No significant
A07:90159174	GH_A07G2202	0.0596498	0.648051	0.133333	No significant
A07:90162716	GH_A07G2203	0.5	0.720484	0.5	No significant
A07:91613507	GH_A07G2274	0.224096	0.23543	0.257143	No significant
A07:92062087	GH_A07G2302	/	0.181084	/	No significant
A07:94002796	GH_A07G2430	0.789681	0.0079249	0.0793925	Significant
A07:94182696	GH_A07G2441	/	0.144831	/	No significant
A07:95685723	GH_A07G2557	0.7	0.565053	1	No significant
A08:107703	GH_A08G0016	0.203413	0.47619	1	No significant
A08:139409	GH_A08G0021	/	0.00765845	/	Significant
A08:194311	GH_A08G0033	/	0.527694	/	No significant
A08:1477853	GH_A08G0176	0.967742	0.0496896	0.732026	Significant
A08:1843224	GH_A08G0210	0.578947	0.631579	1	No significant
A08:1843224	GH_A08G0211	0.736842	0.263158	1	No significant
A08:2309944	GH_A08G0246	0.322442	0.661682	0.225641	No significant
A08:4269467	GH_A08G0397	1	0.36761	0.736326	No significant
A08:5332830	GH_A08G0474	/	0.172249	/	No significant
A08:5659062	GH_A08G0493	/	0.281387	/	No significant
A08:5738266	GH_A08G0499	0.100493	0.022098	0.0357143	Significant
A08:6619257	GH_A08G0560	0.0291607	0.605467	0.0714286	Significant
A08:9155272	GH_A08G0673	/	0.883804	/	No significant
A08:10051404	GH_A08G0691	0.0330362	0.181203	0.412698	Significant
A08:10994531	GH_A08G0723	0.630303	0.0220319	0.429119	Significant
A08:10994532	GH_A08G0723	0.630303	0.0220319	0.429119	Significant
A08:10994698	GH_A08G0723	0.380952	0.868094	0.506564	No significant
A08:11468566	GH_A08G0735	0.326586	0.491228	1	No significant
A08:15134734	GH_A08G0806	0.912656	0.0125286	0.2	Significant
A08:27312860	GH_A08G0918	/	0.946439	/	No significant
A08:31415820	GH_A08G0946	/	0.893791	/	No significant
A08:39387626	GH_A08G0986	0.4	0.179878	0.967742	No significant
A08:43724458	GH_A08G1014	0.133333	0.0653191	0.0134454	Significant
A08:45669356	GH_A08G1035	/	0.0650964	/	No significant
A08:50656164	GH_A08G1061	/	0.460861	/	No significant
A08:61239702	GH_A08G1127	1	1	0.971652	No significant
A08:61240072	GH_A08G1127	/	0.187049	/	No significant
A08:68245332	GH_A08G1172	/	0.643554	/	No significant
A08:69320796	GH_A08G1179	0.571429	0.542202	0.0917828	No significant
A08:73115469	GH_A08G1198	0.8	0.679273	0.878049	No significant
A08:73409795	GH_A08G1199	0.285714	0.552128	0.108108	No significant
A08:75952603	GH_A08G1224	/	0.369231	/	No significant
A08:92323406	GH_A08G1395	1	0.295749	0.628571	No significant
A08:94301963	GH_A08G1447	0.17463	0.837209	1	No significant
A08:100677984	GH_A08G1513	0.795635	0.0193121	0.0425704	Significant
A08:105141361	GH_A08G1652	/	0.820263	/	No significant
A08:105265876	GH_A08G1656	0.153846	0.287334	0.748538	No significant
A08:108797704	GH_A08G1754	0.691936	0.792359	0.7	No significant
A08:110569797	GH_A08G1819	0.524939	0.773706	0.520879	No significant
A08:110758574	GH_A08G1831	0.944444	0.44267	0.952941	No significant
A08:110831801	GH_A08G1833	0.291184	0.133602	0.819814	No significant
A08:110831802	GH_A08G1833	0.291184	0.133602	0.819814	No significant
A08:111706567	GH_A08G1883	0.410986	0.459726	0.4	No significant
A08:111953688	GH_A08G1896	0.526893	/	/	No significant
A08:114984654	GH_A08G2009	0.0373185	0.970748	0.488422	Significant
A08:115160513	GH_A08G2025	0.954545	0.386513	0.9	No significant
A08:115160528	GH_A08G2025	0.97654	0.52794	0.937063	No significant
A08:115323837	GH_A08G2032	0.381598	0.50106	0.372727	No significant
A08:116621457	GH_A08G2089	1	0.783291	0.942261	No significant
A08:119330571	GH_A08G2285	0.0639835	0.529476	0.177391	No significant
A08:120237604	GH_A08G2356	0.505397	0.913305	0.505477	No significant
A08:120492461	GH_A08G2381	/	0.50758	/	No significant
A08:122033780	GH_A08G2516	/	0.900174	/	No significant
A08:123780284	GH_A08G2711	/	0.342293	/	No significant
A08:124056230	GH_A08G2744	0.854181	0.089547	0.4	No significant
A09:4266913	GH_A09G0183	0.32	0.0431419	0.266667	Significant
A09:5800625	GH_A09G0230	/	0.0317768	/	Significant
A09:6304200	GH_A09G0247	/	0.125018	/	No significant
A09:8244728	GH_A09G0311	0.773826	0.982624	1	No significant
A09:8679257	GH_A09G0321	/	0.19503	/	No significant
A09:9437236	GH_A09G0337	0.870588	0.0119328	0.183773	Significant
A09:55541640	GH_A09G0803	0.268276	0.555556	0.8	No significant
A09:58772134	GH_A09G0881	0.371857	0.014041	0.68534	Significant
A09:58772598	GH_A09G0881	0.0314119	0.179024	0.51276	Significant
A09:58773268	GH_A09G0881	0.443697	0.0411765	0.4	Significant
A09:63052983	GH_A09G1083	1	0.315203	0.33007	No significant
A09:63113292	GH_A09G1087	0.664524	0.763567	1	No significant
A09:64471342	GH_A09G1128	/	0.856001	/	No significant
A09:71301593	GH_A09G1515	/	0.6	/	No significant
A09:72202782	GH_A09G1567	0.744335	0.710967	0.9	No significant
A09:73552898	GH_A09G1665	0.607397	0.473595	1	No significant
A09:73563032	GH_A09G1666	/	0.943629	/	No significant
A09:73888660	GH_A09G1690	0.91954	0.477745	0.426471	No significant
A09:73936228	GH_A09G1694	0.293741	0.938999	0.767647	No significant
A09:74014358	GH_A09G1701	1	0.683959	0.816239	No significant
A09:74578709	GH_A09G1770	/	0.367419	/	No significant
A09:75060549	GH_A09G1816	0.142227	0.89392	1	No significant
A09:75256411	GH_A09G1837	0.416469	0.445428	0.372727	No significant
A09:75434469	GH_A09G1856	0.380952	0.904762	1	No significant
A09:75576895	GH_A09G1869	0.705882	0.787395	1	No significant
A09:76444673	GH_A09G1935	0.213321	/	/	No significant
A09:77003961	GH_A09G1997	0.752137	0.448326	0.642857	No significant
A09:77193108	GH_A09G2022	0.889157	0.841391	1	No significant
A09:77461569	GH_A09G2042	0.687903	0.00173801	0.0190476	Significant
A09:77461912	GH_A09G2042	0.950594	0.433333	0.533333	No significant
A09:78648096	GH_A09G2179	0.30303	0.860674	0.285714	No significant
A09:80617793	GH_A09G2395	0.390244	1	0.571429	No significant
A09:81419165	GH_A09G2487	0.228164	0.710764	0.142857	No significant
A09:81920863	GH_A09G2558	0.684211	0.45614	0.666667	No significant
A09:82032705	GH_A09G2572	0.390244	0.146341	1	No significant
A09:82838201	GH_A09G2662	0.0860215	0.703975	0.533333	No significant
A10:528974	GH_A10G0063	/	0.755362	/	No significant
A10:1007580	GH_A10G0125	0.977264	0.0573329	0.0669604	No significant
A10:1754082	GH_A10G0216	0.0155954	0.434582	0.342857	Significant
A10:1770797	GH_A10G0217	/	0.106691	/	No significant
A10:1947585	GH_A10G0236	/	0.84878	/	No significant
A10:2341259	GH_A10G0287	0.248002	/	/	No significant
A10:2569659	GH_A10G0311	/	0.183575	/	No significant
A10:3195698	GH_A10G0383	/	0.883467	/	No significant
A10:4265905	GH_A10G0455	0.795455	0.799559	0.757576	No significant
A10:4453749	GH_A10G0476	/	0.949012	/	No significant
A10:5472586	GH_A10G0544	/	0.127956	/	No significant
A10:6427900	GH_A10G0601	0.526316	0.394474	1	No significant
A10:6571800	GH_A10G0608	0.545296	0.470223	0.370629	No significant
A10:11541948	GH_A10G0759	0.571481	0.746878	0.573427	No significant
A10:13037785	GH_A10G0826	/	0.0343266	/	Significant
A10:18608520	GH_A10G0957	/	0.474533	/	No significant
A10:18644894	GH_A10G0961	0.428571	0.0214707	1	Significant
A10:19230076	GH_A10G0984	0.333333	0.0740417	0.8	No significant
A10:19274719	GH_A10G0985	0.896552	0.302067	0.547619	No significant
A10:21016583	GH_A10G1035	0.12067	0.632636	0.666667	No significant
A10:21117259	GH_A10G1038	0.45977	0.585578	0.666667	No significant
A10:22565934	GH_A10G1065	0.108527	0.179402	0.333333	No significant
A10:31869047	GH_A10G1151	0.971429	0.171429	0.666667	No significant
A10:70577159	GH_A10G1385	/	0.47844	/	No significant
A10:70577352	GH_A10G1385	0.733333	0.366024	0.75	No significant
A10:71436726	GH_A10G1401	/	0.340174	/	No significant
A10:72251764	GH_A10G1415	0.25	0.651787	0.166667	No significant
A10:75701373	GH_A10G1465	0.0292683	0.25	0.666667	Significant
A10:80527474	GH_A10G1567	/	0.242017	/	No significant
A10:91948052	GH_A10G1748	0.576923	0.487617	0.8	No significant
A10:94235589	GH_A10G1787	0.233987	/	/	No significant
A10:96229494	GH_A10G1817	0.284309	0.112383	1	No significant
A10:96708682	GH_A10G1836	0.926829	0.344867	1	No significant
A10:99387259	GH_A10G1887	/	0.1	/	No significant
A10:99647635	GH_A10G1896	/	0.735759	/	No significant
A10:100817301	GH_A10G1944	/	0.482164	/	No significant
A10:106327635	GH_A10G2146	0.090656	0.4703	0.364679	No significant
A10:106327635	GH_A10G2147	0.235175	0.873536	0.364679	No significant
A10:107621516	GH_A10G2209	0.666667	0.326704	0.222222	No significant
A10:109097512	GH_A10G2278	0.507619	0.0269384	0.0268261	Significant
A10:109149028	GH_A10G2279	0.513369	0.970426	0.47619	No significant
A10:109768332	GH_A10G2313	0.466667	0.419355	0.5	No significant
A10:112154510	GH_A10G2467	/	0.43287	/	No significant
A10:114294373	GH_A10G2614	0.697679	0.293354	0.380952	No significant
A10:114397786	GH_A10G2627	0.118393	0.836217	0.533333	No significant
A11:1446704	GH_A11G0157	0.392157	0.891863	0.47619	No significant
A11:2587368	GH_A11G0294	0.30662	0.30982	0.111111	No significant
A11:3107566	GH_A11G0356	0.52381	0.841639	0.666667	No significant
A11:3767544	GH_A11G0432	0.0444444	0.772947	0.666667	Significant
A11:3767642	GH_A11G0432	0.198672	0.160146	0.0441176	Significant
A11:4958411	GH_A11G0560	0.516147	0.358926	0.904762	No significant
A11:5061391	GH_A11G0573	/	0.736548	/	No significant
A11:6981903	GH_A11G0786	/	0.0579082	/	No significant
A11:7225959	GH_A11G0816	/	0.131981	/	No significant
A11:7316051	GH_A11G0825	0.456465	0.548084	0.37151	No significant
A11:7316051	GH_A11G0826	0.968718	0.940229	0.921481	No significant
A11:7339256	GH_A11G0831	0.431206	0.141923	0.190997	No significant
A11:7339892	GH_A11G0831	0.186921	0.263982	0.472654	No significant
A11:7394960	GH_A11G0838	0.505929	0.82454	0.617647	No significant
A11:7986516	GH_A11G0902	0.783799	0.0592067	0.141858	No significant
A11:9359696	GH_A11G1024	0.818182	0.900132	1	No significant
A11:9359696	GH_A11G1025	0.681818	0.966667	1	No significant
A11:9647781	GH_A11G1039	/	0.627001	/	No significant
A11:9716775	GH_A11G1041	/	0.358694	/	No significant
A11:10729824	GH_A11G1106	0.869043	0.269414	0.456044	No significant
A11:10729824	GH_A11G1107	0.832083	0.269414	1	No significant
A11:11707022	GH_A11G1177	0.658824	0.377311	0.8	No significant
A11:11838575	GH_A11G1188	0.635745	0.606087	1	No significant
A11:12606664	GH_A11G1237	0.448569	0.227145	0.285714	No significant
A11:12607887	GH_A11G1237	0.0848743	0.0555556	0.5	No significant
A11:12957126	GH_A11G1267	0.651163	0.650881	1	No significant
A11:14266925	GH_A11G1329	/	0.203242	/	No significant
A11:15660638	GH_A11G1441	/	0.70883	/	No significant
A11:15660638	GH_A11G1442	/	0.784769	/	No significant
A11:18860608	GH_A11G1607	0.335191	0.871123	0.315287	No significant
A11:20014191	GH_A11G1654	0.340426	0.365176	0.5	No significant
A11:20498043	GH_A11G1684	0.869565	0.434783	1	No significant
A11:20510441	GH_A11G1686	0.0846561	0.299013	0.114286	No significant
A11:22917455	GH_A11G1796	0.882137	0.473684	0.8	No significant
A11:22926570	GH_A11G1798	0.914286	0.957143	1	No significant
A11:23826536	GH_A11G1846	0.0190476	0.0525097	0.4	Significant
A11:34105938	GH_A11G2050	0.948025	0.378378	0.4	No significant
A11:38981073	GH_A11G2078	0.27907	0.0634249	0.666667	No significant
A11:56654895	GH_A11G2221	0.970785	0.0822575	0.133333	No significant
A11:77647243	GH_A11G2423	0.0625	0.407996	0.285714	No significant
A11:99429744	GH_A11G2695	0.218297	0.986042	0.392857	No significant
A11:111321889	GH_A11G3081	0.896552	0.762782	0.857143	No significant
A11:111827658	GH_A11G3118	/	0.391304	/	No significant
A11:115046705	GH_A11G3296	0.635119	0.671312	0.4	No significant
A11:118238730	GH_A11G3495	0.611111	0.552128	0.857143	No significant
A11:118375977	GH_A11G3503	0.42648	0.412219	0.190476	No significant
A11:119194844	GH_A11G3559	0.902256	0.133758	0.286166	No significant
A11:119412733	GH_A11G3573	0.133037	0.824285	0.329004	No significant
A11:119412735	GH_A11G3573	0.10158	0.644395	0.329004	No significant
A12:330250	GH_A12G0018	0.054386	0.0246227	0.316532	Significant
A12:517744	GH_A12G0032	0.386991	0.915375	0.538203	No significant
A12:748910	GH_A12G0053	/	0.66798	/	No significant
A12:2152680	GH_A12G0159	0.384727	0.206577	0.0493477	Significant
A12:2432272	GH_A12G0174	0.854569	0.646986	0.833333	No significant
A12:2962939	GH_A12G0211	/	0.113966	/	No significant
A12:3635851	GH_A12G0253	0.529412	0.272269	1	No significant
A12:4594834	GH_A12G0298	0.588589	0.918919	1	No significant
A12:4870277	GH_A12G0311	/	0.58424	/	No significant
A12:8173986	GH_A12G0442	0.594595	0.864865	1	No significant
A12:9096925	GH_A12G0464	0.75	/	/	No significant
A12:9339721	GH_A12G0472	0.810702	0.470336	0.381699	No significant
A12:9411099	GH_A12G0477	0.590909	0.940773	0.571429	No significant
A12:9456019	GH_A12G0480	0.909091	0.323328	0.529101	No significant
A12:9456554	GH_A12G0480	0.517953	0.0870064	0.689474	No significant
A12:11568079	GH_A12G0539	0.0851064	0.212766	1	No significant
A12:11907713	GH_A12G0548	/	0.867868	/	No significant
A12:12866324	GH_A12G0576	/	0.388947	/	No significant
A12:14473686	GH_A12G0643	0.769231	0.726199	0.857143	No significant
A12:22482735	GH_A12G0745	0.129032	0.968776	0.142857	No significant
A12:73719037	GH_A12G1085	0.684211	0.456402	0.888889	No significant
A12:79044937	GH_A12G1184	/	0.296773	/	No significant
A12:81096047	GH_A12G1276	0.0571429	0.198494	0.25	No significant
A12:84442060	GH_A12G1418	0.672917	0.496492	0.789741	No significant
A12:84822807	GH_A12G1438	/	0.669028	/	No significant
A12:87272466	GH_A12G1579	0.0735632	0.180645	0.2	No significant
A12:88676375	GH_A12G1615	0.348387	0.38521	0.307692	No significant
A12:90315875	GH_A12G1672	/	0.184544	/	No significant
A12:90645600	GH_A12G1687	/	0.746512	/	No significant
A12:91515797	GH_A12G1713	0.341463	0.634146	1	No significant
A12:91730668	GH_A12G1719	1	0.560117	0.840917	No significant
A12:92271566	GH_A12G1745	1	0.352784	0.646798	No significant
A12:95890972	GH_A12G1938	0.305263	0.493208	0.124542	No significant
A12:97253054	GH_A12G1985	/	0.635119	/	No significant
A12:98687549	GH_A12G2098	0.689079	0.417635	0.898275	No significant
A12:99200099	GH_A12G2125	0.96	0.505189	0.609524	No significant
A12:100421086	GH_A12G2211	1	0.586119	0.6	No significant
A12:100920441	GH_A12G2264	1	0.203473	0.956522	No significant
A12:100920442	GH_A12G2264	1	1	1	No significant
A12:101131483	GH_A12G2286	1	0.856909	1	No significant
A12:101193513	GH_A12G2293	/	0.194332	/	No significant
A12:102367399	GH_A12G2395	/	0.0948936	/	No significant
A12:102853476	GH_A12G2443	0.64	0.242315	0.4	No significant
A12:103171773	GH_A12G2480	0.625	0.768282	0.75	No significant
A12:103402614	GH_A12G2499	0.918261	0.247617	0.25048	No significant
A12:103686616	GH_A12G2519	0.748663	0.610067	1	No significant
A12:103706541	GH_A12G2522	0.408964	0.0556359	0.142857	No significant
A12:103887453	GH_A12G2537	0.630631	0.14962	1	No significant
A12:103890690	GH_A12G2538	0.215126	0.406723	1	No significant
A12:103890690	GH_A12G2539	0.568067	0.806723	0.666667	No significant
A12:104185294	GH_A12G2582	/	0.524503	/	No significant
A12:104476783	GH_A12G2617	0.615385	0.451291	0.888889	No significant
A12:105211319	GH_A12G2705	0.97561	0.122977	0.571429	No significant
A12:106325032	GH_A12G2840	0.447497	0.732819	0.857143	No significant
A12:106336581	GH_A12G2841	0.48	0.100756	0.363636	No significant
A12:106724668	GH_A12G2881	0.137518	/	/	No significant
A12:107416229	GH_A12G2963	0.825911	0.157895	0.666667	No significant
A13:117865	GH_A13G0013	0.826087	0.46265	0.5	No significant
A13:1446884	GH_A13G0134	/	0.181201	/	No significant
A13:4823232	GH_A13G0396	0.407792	0.237726	0.0784615	No significant
A13:5531308	GH_A13G0451	/	0.761419	/	No significant
A13:5587494	GH_A13G0454	/	0.567627	/	No significant
A13:6672337	GH_A13G0510	0.248804	0.520959	0.129022	No significant
A13:6762372	GH_A13G0515	0.0616541	0.0495719	0.312308	Significant
A13:9761929	GH_A13G0537	0.972973	0.647926	1	No significant
A13:11896779	GH_A13G0600	/	0.169315	/	No significant
A13:13071154	GH_A13G0636	0.647023	0.331872	0.642857	No significant
A13:13157348	GH_A13G0642	0.396396	0.111111	0.666667	No significant
A13:13158151	GH_A13G0642	/	0.741815	/	No significant
A13:14420722	GH_A13G0689	0.513443	0.0691905	0.679842	No significant
A13:14517439	GH_A13G0693	0.390244	0.682927	1	No significant
A13:31962861	GH_A13G0912	0.568067	0.769475	1	No significant
A13:32004441	GH_A13G0914	0.860912	0.682674	0.953436	No significant
A13:32224954	GH_A13G0923	0.959926	0.363101	0.523699	No significant
A13:54895023	GH_A13G1090	0.801034	0.803253	1	No significant
A13:56558531	GH_A13G1110	0.689474	0.832281	0.6	No significant
A13:67185298	GH_A13G1173	0.294118	0.122624	0.666667	No significant
A13:68368807	GH_A13G1192	/	0.0917679	/	No significant
A13:77157127	GH_A13G1302	0.909091	0.9375	0.5	No significant
A13:80674055	GH_A13G1362	/	0.675936	/	No significant
A13:89872481	GH_A13G1490	0.108582	0.529541	0.116667	No significant
A13:90527990	GH_A13G1503	0.967742	0.628911	1	No significant
A13:91128276	GH_A13G1522	0.564103	1	0.666667	No significant
A13:91302509	GH_A13G1531	0.659341	0.730019	0.541872	No significant
A13:93603710	GH_A13G1602	0.255891	0.305438	1	No significant
A13:95817470	GH_A13G1697	0.4	0.521094	0.533333	No significant
A13:96415916	GH_A13G1721	/	0.972973	/	No significant
A13:97014192	GH_A13G1750	0.652345	0.100331	0.114286	No significant
A13:98930661	GH_A13G1822	0.102564	0.487617	0.5	No significant
A13:101128108	GH_A13G1898	0.097561	0.489735	0.133333	No significant
A13:102532261	GH_A13G1949	0.356391	0.663186	0.307792	No significant
A13:103365318	GH_A13G2012	0.25641	/	/	No significant
A13:104643804	GH_A13G2083	0.0913313	0.796094	0.21978	No significant
A13:105050099	GH_A13G2126	0.456841	0.488981	0.367677	No significant
A13:105558296	GH_A13G2174	0.366875	1	0.482002	No significant
A13:105745427	GH_A13G2189	0.0139088	0.0307354	0.824859	Significant
A13:106027945	GH_A13G2219	0.545455	0.948545	1	No significant
A13:106283113	GH_A13G2252	/	0.704356	/	No significant
A13:106848042	GH_A13G2293	0.595047	0.735234	0.719695	No significant
A13:106848042	GH_A13G2294	0.846973	0.428669	0.446968	No significant
A13:107020529	GH_A13G2311	0.726242	0.335789	0.666667	No significant
A13:108074912	GH_A13G2373	0.845666	0.189852	0.8	No significant
A13:108074912	GH_A13G2374	0.763214	0.880902	1	No significant
A13:109195587	GH_A13G2489	0.0609756	0.0349566	0.533333	Significant
A13:109195587	GH_A13G2490	0.0878049	0.0349566	1	Significant
A13:109550731	GH_A13G2535	0.681818	0.194439	0.333333	No significant
D01:80918	GH_D01G0010	0.628571	0.202059	1	No significant
D01:391882	GH_D01G0052	0.974359	0.769231	0.666667	No significant
D01:392997	GH_D01G0052	0.761905	0.405933	1	No significant
D01:1120155	GH_D01G0151	0.323448	0.414028	0.284382	No significant
D01:1149393	GH_D01G0154	0.156863	0.0951279	0.569801	No significant
D01:2371342	GH_D01G0291	0.642857	0.509744	0.588235	No significant
D01:3106187	GH_D01G0347	0.822191	0.948025	1	No significant
D01:3130974	GH_D01G0348	0.25641	0.14728	0.5	No significant
D01:3995056	GH_D01G0410	/	0.868793	/	No significant
D01:5601113	GH_D01G0503	0.3	0.95	1	No significant
D01:6250334	GH_D01G0556	/	0.627891	/	No significant
D01:7473526	GH_D01G0644	/	0.355528	/	No significant
D01:9151586	GH_D01G0715	/	1	/	No significant
D01:9872022	GH_D01G0759	0.789741	0.793609	0.848707	No significant
D01:10787080	GH_D01G0833	0.63496	0.142601	1	No significant
D01:12093143	GH_D01G0927	0.392567	0.634146	0.666667	No significant
D01:15114509	GH_D01G1036	/	0.192264	/	No significant
D01:15114671	GH_D01G1036	0.131232	0.580645	0.8	No significant
D01:15404924	GH_D01G1052	0.671312	0.829268	0.666667	No significant
D01:15743760	GH_D01G1078	0.0724454	0.444961	0.4	No significant
D01:17427996	GH_D01G1151	0.623331	/	/	No significant
D01:19146981	GH_D01G1215	/	0.449135	/	No significant
D01:23704772	GH_D01G1327	0.040404	0.729293	0.333333	Significant
D01:24709742	GH_D01G1346	0.982092	0.392567	0.8	No significant
D01:24709758	GH_D01G1346	1	0.403118	0.785714	No significant
D01:39127111	GH_D01G1562	0.0952381	0.00276052	0.333333	Significant
D01:46011919	GH_D01G1703	0.0350672	0.244786	0.628571	Significant
D01:46645297	GH_D01G1712	0.846774	0.149368	0.581818	No significant
D01:49535295	GH_D01G1763	0.789843	0.407007	0.811535	No significant
D01:51303972	GH_D01G1808	/	0.336546	/	No significant
D01:53817204	GH_D01G1870	1	0.616355	0.541872	No significant
D01:57730160	GH_D01G2044	0.698752	0.184799	0.642857	No significant
D01:58372828	GH_D01G2082	0.444033	0.875472	0.857143	No significant
D01:60985294	GH_D01G2242	0.25641	0.102564	1	No significant
D01:61401521	GH_D01G2270	0.62101	0.122449	0.222222	No significant
D01:62773342	GH_D01G2371	/	0.782404	/	No significant
D01:63077924	GH_D01G2401	0.0761726	0.25641	1	No significant
D01:63197152	GH_D01G2407	0.369231	/	/	No significant
D01:64521977	GH_D01G2564	0.640467	0.830571	0.444324	No significant
D02:105142	GH_D02G0010	0.734066	0.327115	0.483419	No significant
D02:166019	GH_D02G0022	0.102564	0.279321	0.315271	No significant
D02:197559	GH_D02G0029	0.856909	0.369163	0.555556	No significant
D02:452886	GH_D02G0059	/	0.884818	/	No significant
D02:932520	GH_D02G0114	0.0317371	0.715107	0.428571	Significant
D02:1248872	GH_D02G0127	0.75786	0.26782	0.75786	No significant
D02:1643101	GH_D02G0160	0.0949051	0.903872	0.0913313	No significant
D02:2472602	GH_D02G0222	/	0.62439	/	No significant
D02:4394182	GH_D02G0351	0.83004	0.106968	0.448352	No significant
D02:6490985	GH_D02G0509	0.764912	0.441676	0.404291	No significant
D02:7968249	GH_D02G0620	0.442146	0.562964	0.232425	No significant
D02:20434078	GH_D02G0974	0.884818	0.894737	1	No significant
D02:25227926	GH_D02G1071	0.0588235	0.0824892	0.4	No significant
D02:39955504	GH_D02G1305	0.0588235	0.924313	0.0316206	Significant
D02:41815995	GH_D02G1339	/	0.736676	/	No significant
D02:42531778	GH_D02G1355	/	0.75	/	No significant
D02:42719169	GH_D02G1358	0.220402	0.588565	0.316544	No significant
D02:46483079	GH_D02G1454	0.132254	0.296896	1	No significant
D02:47258238	GH_D02G1470	0.25	0.658035	0.125	No significant
D02:50405300	GH_D02G1531	0.857143	0.384127	1	No significant
D02:52224994	GH_D02G1565	/	0.886735	/	No significant
D02:52913093	GH_D02G1582	0.0108696	0.833977	0.025	Significant
D02:53565360	GH_D02G1604	0.0512821	0.726976	0.380952	No significant
D02:53565362	GH_D02G1604	0.146341	0.712918	0.666667	No significant
D02:54488527	GH_D02G1621	0.363636	0.181818	1	No significant
D02:55702498	GH_D02G1658	0.0246154	0.108854	0.0761905	Significant
D02:55846373	GH_D02G1663	0.485963	0.941321	0.833333	No significant
D02:57725876	GH_D02G1722	0.213321	0.568	0.785714	No significant
D02:57978301	GH_D02G1733	0.15632	0.000822178	0.0555556	Significant
D02:58219109	GH_D02G1739	0.496443	0.948002	0.229795	No significant
D02:60758579	GH_D02G1832	0.867762	0.754807	0.527273	No significant
D02:60758579	GH_D02G1833	0.150586	0.711902	0.527273	No significant
D02:61842425	GH_D02G1866	0.282734	1	0.288749	No significant
D02:63200689	GH_D02G1948	0.829737	0.782167	0.910106	No significant
D02:63377635	GH_D02G1962	0.342857	0.950108	0.350877	No significant
D02:63387195	GH_D02G1963	0.14947	0.604017	0.282828	No significant
D02:63866089	GH_D02G1981	0.729293	0.272727	0.666667	No significant
D02:63956521	GH_D02G1988	/	0.675453	/	No significant
D02:64246307	GH_D02G2019	0.656305	0.249592	0.71049	No significant
D02:64498931	GH_D02G2032	0.533333	0.210669	0.5	No significant
D02:64499010	GH_D02G2032	/	0.216216	/	No significant
D02:64590695	GH_D02G2042	0.367275	0.140746	0.371093	No significant
D02:65304741	GH_D02G2096	0.6	0.56393	0.857143	No significant
D02:65677446	GH_D02G2126	1	0.282858	0.627329	No significant
D02:66649989	GH_D02G2202	/	0.553609	/	No significant
D02:67315345	GH_D02G2274	0.662069	0.465938	0.857143	No significant
D02:67602517	GH_D02G2312	0.562898	0.612686	0.642857	No significant
D02:67603318	GH_D02G2312	0.731331	0.57473	1	No significant
D02:67831971	GH_D02G2337	0.588235	0.0571429	1	No significant
D02:67832289	GH_D02G2337	0.0571429	0.854569	0.5	No significant
D02:67833006	GH_D02G2337	/	0.171376	/	No significant
D02:68193838	GH_D02G2379	/	0.108527	/	No significant
D02:68956018	GH_D02G2476	/	0.129293	/	No significant
D02:69362043	GH_D02G2549	0.340426	0.70922	0.666667	No significant
D02:69395278	GH_D02G2556	/	0.0516809	/	No significant
D02:69622578	GH_D02G2596	0.209794	0.213922	1	No significant
D03:92177	GH_D03G0007	0.431818	0.912075	0.20723	No significant
D03:346557	GH_D03G0052	/	0.557491	/	No significant
D03:739152	GH_D03G0106	0.530444	0.461219	0.883051	No significant
D03:739311	GH_D03G0106	0.10049	0.352492	0.18735	No significant
D03:1343262	GH_D03G0174	0.66531	0.489147	1	No significant
D03:2665432	GH_D03G0277	/	0.619805	/	No significant
D03:6050833	GH_D03G0455	0.443812	0.901412	0.8	No significant
D03:9351243	GH_D03G0574	/	0.918919	/	No significant
D03:10137693	GH_D03G0591	0.722222	0.108108	0.666667	No significant
D03:20889523	GH_D03G0735	/	0.678357	/	No significant
D03:22719633	GH_D03G0778	0.349277	0.903243	0.392857	No significant
D03:32413160	GH_D03G0906	/	0.765617	/	No significant
D03:34092980	GH_D03G0961	0.290298	0.912656	0.8	No significant
D03:34878119	GH_D03G0982	0.291209	0.724483	0.228778	No significant
D03:37637100	GH_D03G1065	0.542085	0.342857	0.5	No significant
D03:38486154	GH_D03G1102	0.863492	0.732819	0.8	No significant
D03:39077637	GH_D03G1120	0.0740741	0.222222	0.5	No significant
D03:39230055	GH_D03G1126	0.0888889	0.622222	1	No significant
D03:39230245	GH_D03G1126	/	0.672673	/	No significant
D03:39379549	GH_D03G1132	0.375	0.564935	0.4	No significant
D03:39379796	GH_D03G1132	0.860504	0.971429	1	No significant
D03:40523507	GH_D03G1167	/	0.0915855	/	No significant
D03:45378454	GH_D03G1375	/	0.572504	/	No significant
D03:46253107	GH_D03G1428	0.857143	0.0687469	0.47619	No significant
D03:46291027	GH_D03G1429	0.573999	0.207159	0.484848	No significant
D03:47013515	GH_D03G1466	0.857143	0.451834	0.8	No significant
D03:48958812	GH_D03G1576	0.150509	0.932605	0.194567	No significant
D03:49002978	GH_D03G1582	/	0.443812	/	No significant
D03:49044252	GH_D03G1584	0.52437	0.326484	0.333333	No significant
D03:49428624	GH_D03G1608	0.606973	0.884011	0.832945	No significant
D03:49689014	GH_D03G1629	/	0.440486	/	No significant
D03:50816842	GH_D03G1724	0.483419	0.0231966	0.303406	Significant
D03:51636460	GH_D03G1798	0.734143	0.623809	1	No significant
D03:53185661	GH_D03G1888	0.789474	0.70629	0.666667	No significant
D03:53185661	GH_D03G1889	0.842105	0.304342	1	No significant
D03:53256376	GH_D03G1897	0.120949	0.462122	0.566293	No significant
D04:867339	GH_D04G0062	0.488889	0.961721	0.666667	No significant
D04:1032621	GH_D04G0079	0.202059	0.418231	0.0181818	Significant
D04:1230458	GH_D04G0098	/	0.84294	/	No significant
D04:1936988	GH_D04G0153	0.505747	0.7411	0.436364	No significant
D04:3136773	GH_D04G0230	0.208816	0.500581	1	No significant
D04:3391555	GH_D04G0244	0.380952	0.333333	1	No significant
D04:3581373	GH_D04G0261	/	0.524291	/	No significant
D04:3716109	GH_D04G0271	0.188153	0.130081	1	No significant
D04:6588260	GH_D04G0440	0.570597	0.498691	0.34825	No significant
D04:6616375	GH_D04G0443	0.662069	0.0931557	0.190476	No significant
D04:10593186	GH_D04G0634	/	0.648235	/	No significant
D04:14173909	GH_D04G0753	/	0.0882653	/	No significant
D04:14260656	GH_D04G0755	0.63467	0.973753	0.471812	No significant
D04:20933381	GH_D04G0894	0.619048	0.717608	0.666667	No significant
D04:20933381	GH_D04G0895	0.190476	0.179402	0.666667	No significant
D04:32273586	GH_D04G1030	/	0.512411	/	No significant
D04:34210882	GH_D04G1065	/	/	0.479973	No significant
D04:36344235	GH_D04G1126	0.83871	0.424793	0.714286	No significant
D04:40492456	GH_D04G1219	0.97561	0.735759	0.8	No significant
D04:42421550	GH_D04G1279	0.318717	0.768769	0.888889	No significant
D04:45675519	GH_D04G1391	/	0.463768	/	No significant
D04:47335341	GH_D04G1437	1	0.497872	0.757464	No significant
D04:47335761	GH_D04G1437	0.497549	0.60362	0.553695	No significant
D04:47845389	GH_D04G1455	0.387097	0.175925	0.791209	No significant
D04:49921311	GH_D04G1537	0.10449	0.489796	0.666667	No significant
D04:50187902	GH_D04G1551	0.242424	0.679874	0.4	No significant
D04:51020623	GH_D04G1588	0.089547	0.380488	0.2	No significant
D04:52148372	GH_D04G1652	0.193548	0.416422	0.5	No significant
D04:53122583	GH_D04G1739	0.679842	0.43642	0.650649	No significant
D04:53228531	GH_D04G1747	0.555556	/	/	No significant
D04:53328240	GH_D04G1757	0.722222	0.375553	0.857143	No significant
D04:53328240	GH_D04G1758	0.0555556	0.30145	0.285714	No significant
D04:53780104	GH_D04G1801	/	0.0930233	/	No significant
D04:55651215	GH_D04G2002	0.575613	0.935348	0.361571	No significant
D05:704073	GH_D05G0073	0.626781	0.912748	0.947368	No significant
D05:842633	GH_D05G0094	0.512195	0.880488	1	No significant
D05:1164309	GH_D05G0123	/	0.105263	/	No significant
D05:1472258	GH_D05G0158	/	1	/	No significant
D05:1591617	GH_D05G0177	0.25641	0.470334	0.833333	No significant
D05:1591617	GH_D05G0178	0.820513	0.934139	0.833333	No significant
D05:1626773	GH_D05G0181	0.814885	0.477745	0.86597	No significant
D05:2558836	GH_D05G0304	0.00888788	0.134966	0.00284241	Significant
D05:2582232	GH_D05G0308	/	0.645687	/	No significant
D05:2582232	GH_D05G0309	/	0.183063	/	No significant
D05:3701028	GH_D05G0466	0.302859	0.448346	0.628571	No significant
D05:4024329	GH_D05G0507	0.358974	0.369231	1	No significant
D05:4840342	GH_D05G0605	0.117343	0.864865	0.631579	No significant
D05:5938276	GH_D05G0741	0.539665	0.390244	0.5	No significant
D05:6424722	GH_D05G0793	0.429809	0.465938	0.180653	No significant
D05:6569414	GH_D05G0815	0.0205544	0.671955	0.569697	Significant
D05:7082890	GH_D05G0875	0.411765	0.20842	0.929757	No significant
D05:7339349	GH_D05G0906	/	0.146093	/	No significant
D05:7823875	GH_D05G0969	/	0.293741	/	No significant
D05:8834669	GH_D05G1077	0.7	0.310591	0.333333	No significant
D05:8886735	GH_D05G1084	0.520492	0.32004	0.785714	No significant
D05:9082196	GH_D05G1106	0.833944	0.761487	0.952941	No significant
D05:9315625	GH_D05G1133	0.546547	0.3003	0.666667	No significant
D05:9522657	GH_D05G1156	0.129721	0.128226	0.393162	No significant
D05:9976549	GH_D05G1206	0.531	0.671775	0.534965	No significant
D05:10697012	GH_D05G1289	0.511468	0.545455	1	No significant
D05:11338576	GH_D05G1360	/	0.918549	/	No significant
D05:11722521	GH_D05G1408	0.979853	0.520086	0.493963	No significant
D05:12077526	GH_D05G1448	0.746341	0.677526	0.2	No significant
D05:12478825	GH_D05G1495	0.58424	0.125641	0.8	No significant
D05:12722981	GH_D05G1514	0.631241	0.0545291	0.322224	No significant
D05:12832171	GH_D05G1526	0.6	0.746341	0.666667	No significant
D05:13005880	GH_D05G1549	0.183008	1	0.380952	No significant
D05:13066164	GH_D05G1560	0.0952381	0.892929	0.4	No significant
D05:13317829	GH_D05G1579	0.056899	0.744436	0.266667	No significant
D05:14099346	GH_D05G1655	0.612183	0.54827	0.961215	No significant
D05:14099346	GH_D05G1657	0.363784	0.569042	0.732547	No significant
D05:14880376	GH_D05G1753	/	0.685809	/	No significant
D05:15433783	GH_D05G1821	/	0.753734	/	No significant
D05:15512100	GH_D05G1833	0.751498	0.160278	0.335488	No significant
D05:15713227	GH_D05G1853	0.258065	0.746878	0.363636	No significant
D05:15889731	GH_D05G1869	0.890909	0.367677	0.666667	No significant
D05:16048602	GH_D05G1891	0.0465116	0.982946	0.5	Significant
D05:16636680	GH_D05G1947	/	0.257796	/	No significant
D05:16971125	GH_D05G1991	0.932147	0.732334	0.784874	No significant
D05:17016504	GH_D05G2000	0.872454	0.644652	0.9	No significant
D05:17042953	GH_D05G2001	0.278352	0.427297	0.672472	No significant
D05:17532181	GH_D05G2056	0.133208	0.769231	0.5	No significant
D05:17753663	GH_D05G2075	0.949672	0.297792	0.28955	No significant
D05:17770122	GH_D05G2079	0.182382	0.713269	0.328306	No significant
D05:18551738	GH_D05G2161	1	0.275016	0.857143	No significant
D05:18552074	GH_D05G2161	/	0.282051	/	No significant
D05:18947200	GH_D05G2194	0.589474	0.948227	0.733333	No significant
D05:19335296	GH_D05G2224	0.0947368	0.6503	0.378947	No significant
D05:19493931	GH_D05G2235	/	0.42163	/	No significant
D05:19515010	GH_D05G2238	0.979386	0.967742	1	No significant
D05:19928554	GH_D05G2280	0.39131	0.569678	0.693123	No significant
D05:19938002	GH_D05G2281	0.676923	0.538791	0.732026	No significant
D05:21014661	GH_D05G2359	0.136452	0.151875	1	No significant
D05:21766668	GH_D05G2417	/	0.842935	/	No significant
D05:23689796	GH_D05G2568	0.117647	0.263186	0.2	No significant
D05:24848937	GH_D05G2673	/	0.0399869	/	Significant
D05:24849122	GH_D05G2673	/	0.0634921	/	No significant
D05:25020018	GH_D05G2685	/	0.224348	/	No significant
D05:25020031	GH_D05G2685	/	0.671312	/	No significant
D05:26684687	GH_D05G2799	0.615385	0.81831	0.5	No significant
D05:26699179	GH_D05G2800	/	0.224368	/	No significant
D05:28701582	GH_D05G2911	/	0.30303	/	No significant
D05:28937585	GH_D05G2924	0.918919	0.00678411	0.5	Significant
D05:31187998	GH_D05G3026	0.948316	0.297603	0.197116	No significant
D05:51411701	GH_D05G3497	0.814828	0.921869	0.666667	No significant
D05:54577581	GH_D05G3604	0.299657	0.164629	0.281862	No significant
D05:54609457	GH_D05G3605	0.978245	0.635681	0.90959	No significant
D05:54897070	GH_D05G3622	0.126482	0.56722	0.43956	No significant
D05:56360146	GH_D05G3683	0.048048	0.289018	0.266667	Significant
D05:57010039	GH_D05G3721	/	0.935266	/	No significant
D05:61748388	GH_D05G3933	1	0.57571	0.679842	No significant
D05:61846838	GH_D05G3941	0.0213904	0.00326919	0.0444444	Significant
D05:62057136	GH_D05G3961	0.743248	0.835424	0.516667	No significant
D05:63530571	GH_D05G4030	0.9375	0.632825	0.2	No significant
D06:146824	GH_D06G0025	0.551724	0.680367	0.4	No significant
D06:1905903	GH_D06G0191	0.666667	0.842935	0.666667	No significant
D06:4069555	GH_D06G0350	0.432432	0.867868	0.333333	No significant
D06:5117428	GH_D06G0388	0.291597	1	0.7	No significant
D06:5341586	GH_D06G0398	0.634928	0.67797	0.659341	No significant
D06:5659157	GH_D06G0421	0.0409235	0.552128	0.0666667	Significant
D06:6711076	GH_D06G0480	/	0.563532	/	No significant
D06:7151977	GH_D06G0510	/	0.756757	/	No significant
D06:8044810	GH_D06G0557	0.833333	0.771711	1	No significant
D06:14509718	GH_D06G0836	/	0.0613108	/	No significant
D06:16695610	GH_D06G0906	0.376588	0.652614	0.681977	No significant
D06:18776357	GH_D06G0962	0.820513	0.820263	0.4	No significant
D06:19342670	GH_D06G0998	0.645388	0.822002	1	No significant
D06:19415272	GH_D06G1002	/	0.466667	/	No significant
D06:21856242	GH_D06G1069	0.277778	0.319346	0.5	No significant
D06:26031683	GH_D06G1191	0.702703	0.191203	1	No significant
D06:27428554	GH_D06G1212	0.857143	0.112512	0.5	No significant
D06:29569521	GH_D06G1255	0.615959	0.765617	1	No significant
D06:42473195	GH_D06G1432	0.451523	0.533239	1	No significant
D06:43349675	GH_D06G1451	/	0.384152	/	No significant
D06:44811755	GH_D06G1475	0.714286	/	/	No significant
D06:52795423	GH_D06G1660	0.769164	0.144751	0.50931	No significant
D06:53769673	GH_D06G1685	/	0.209608	/	No significant
D06:53769935	GH_D06G1685	0.322581	0.391208	0.25	No significant
D06:53979184	GH_D06G1693	0.728861	0.242536	1	No significant
D06:55950292	GH_D06G1759	0.516129	0.00175849	1	Significant
D06:57632503	GH_D06G1854	0.119617	0.24551	0.932792	No significant
D06:59048805	GH_D06G1924	/	0.442148	/	No significant
D06:59272813	GH_D06G1938	0.97561	0.397387	0.8	No significant
D06:60023157	GH_D06G1973	0.88984	0.128342	0.2	No significant
D06:61121886	GH_D06G2042	/	0.432873	/	No significant
D06:61662527	GH_D06G2074	0.408964	0.292594	0.833333	No significant
D06:61721542	GH_D06G2079	0.0826499	0.541547	0.0560066	No significant
D06:62799768	GH_D06G2151	0.431373	0.895983	0.606061	No significant
D06:63544762	GH_D06G2209	/	0.347102	/	No significant
D06:64379147	GH_D06G2303	/	0.901412	/	No significant
D06:64379147	GH_D06G2304	/	0.564176	/	No significant
D06:65011006	GH_D06G2381	0.461538	0.956098	0.666667	No significant
D06:65265100	GH_D06G2424	/	0.139535	/	No significant
D06:65458256	GH_D06G2439	0.644381	0.319346	0.4	No significant
D07:1094509	GH_D07G0111	0.512821	0.433333	0.666667	No significant
D07:1831057	GH_D07G0193	/	0.706877	/	No significant
D07:2304081	GH_D07G0239	0.444444	0.448898	0.387097	No significant
D07:3701807	GH_D07G0375	/	0.733615	/	No significant
D07:3709080	GH_D07G0376	/	0.941321	/	No significant
D07:3741459	GH_D07G0379	/	0.424044	/	No significant
D07:4733310	GH_D07G0467	0.594595	0.844885	0.4	No significant
D07:4797352	GH_D07G0474	1	0.771457	1	No significant
D07:5532795	GH_D07G0551	/	0.981589	/	No significant
D07:5533279	GH_D07G0551	0.724706	0.00294197	1	Significant
D07:5845932	GH_D07G0571	0.692308	0.137196	0.32	No significant
D07:6011554	GH_D07G0588	0.222222	0.737839	0.8	No significant
D07:6252978	GH_D07G0610	0.936562	0.610845	0.746735	No significant
D07:6684792	GH_D07G0648	0.513634	0.704387	0.448047	No significant
D07:6707765	GH_D07G0649	0.134952	0.953501	0.209328	No significant
D07:6853533	GH_D07G0662	0.736842	0.925063	0.869565	No significant
D07:7112877	GH_D07G0680	0.454545	0.772727	1	No significant
D07:8212760	GH_D07G0769	0.588865	0.635496	0.727273	No significant
D07:10304222	GH_D07G0899	0.363535	0.0152463	0.602536	Significant
D07:11137647	GH_D07G0960	0.91746	0.26124	0.909091	No significant
D07:11215560	GH_D07G0972	0.291667	0.0764521	0.666667	No significant
D07:11867348	GH_D07G1014	/	0.35902	/	No significant
D07:12314584	GH_D07G1035	0.818182	0.801449	1	No significant
D07:13138423	GH_D07G1078	/	0.870743	/	No significant
D07:13269290	GH_D07G1090	0.818182	0.16901	0.7	No significant
D07:14571805	GH_D07G1153	/	0.118544	/	No significant
D07:14784720	GH_D07G1164	/	0.137633	/	No significant
D07:15847386	GH_D07G1212	0.0948617	0.937176	0.00615385	Significant
D07:16067350	GH_D07G1223	0.44335	0.361517	0.816667	No significant
D07:17432822	GH_D07G1291	/	1	/	No significant
D07:19804658	GH_D07G1393	0.355107	0.493588	1	No significant
D07:20343362	GH_D07G1420	0.296296	0.0310355	0.266667	Significant
D07:21027277	GH_D07G1451	0.181818	0.246503	0.111111	No significant
D07:22360496	GH_D07G1514	0.094999	0.168945	0.931713	No significant
D07:22774124	GH_D07G1528	0.542669	0.0907724	0.1	No significant
D07:23954005	GH_D07G1555	/	0.58365	/	No significant
D07:24973723	GH_D07G1594	0.773033	0.8955	0.628571	No significant
D07:25419616	GH_D07G1605	0.74373	/	/	No significant
D07:26611333	GH_D07G1632	0.573099	0.00616334	0.689459	Significant
D07:29970638	GH_D07G1700	/	0.885035	/	No significant
D07:31594941	GH_D07G1749	0.129032	0.272292	0.363636	No significant
D07:38625247	GH_D07G1879	/	0.67129	/	No significant
D07:38814263	GH_D07G1886	1	0.565955	0.8	No significant
D07:39226415	GH_D07G1895	0.734143	0.0526316	0.666667	No significant
D07:45701985	GH_D07G1945	0.820924	0.0689597	0.352941	No significant
D07:46742996	GH_D07G1981	0.36517	0.92929	0.493644	No significant
D07:47185749	GH_D07G1991	0.409286	0.748243	0.228571	No significant
D07:50651915	GH_D07G2088	0.600942	0.240765	0.628571	No significant
D07:51648730	GH_D07G2123	0.901149	0.67797	0.769231	No significant
D07:53680608	GH_D07G2227	0.238095	0.428498	0.333333	No significant
D07:54094865	GH_D07G2259	0.702703	0.643373	0.888889	No significant
D07:54511650	GH_D07G2284	0.443697	0.179272	0.2	No significant
D07:55148956	GH_D07G2334	0.4	0.677526	0.5	No significant
D07:57377318	GH_D07G2498	0.157895	0.661741	0.5	No significant
D07:57486014	GH_D07G2511	0.0236112	0.701726	0.666667	Significant
D07:57721967	GH_D07G2528	0.166667	0.878615	0.5	No significant
D07:57964926	GH_D07G2546	0.871795	0.906379	1	No significant
D08:118567	GH_D08G0020	0.197561	/	/	No significant
D08:931300	GH_D08G0122	0.508007	0.863036	0.160975	No significant
D08:1050232	GH_D08G0140	0.636364	0.0342236	0.857143	Significant
D08:1080708	GH_D08G0142	0.182409	0.334851	0.392448	No significant
D08:1376828	GH_D08G0173	0.780027	0.736842	0.666667	No significant
D08:1429415	GH_D08G0178	0.97561	0.0219512	0.666667	Significant
D08:2309528	GH_D08G0264	0.2	0.381733	0.222222	No significant
D08:2849510	GH_D08G0320	/	0.210729	/	No significant
D08:2901496	GH_D08G0327	0.768473	0.924254	0.769231	No significant
D08:2998186	GH_D08G0337	0.73817	0.80275	0.937063	No significant
D08:4445025	GH_D08G0456	0.866667	0.400067	1	No significant
D08:4960459	GH_D08G0494	/	0.74258	/	No significant
D08:4995460	GH_D08G0495	0.235294	0.868923	0.8	No significant
D08:5253517	GH_D08G0509	0.704878	0.708024	0.428571	No significant
D08:5288236	GH_D08G0511	0.611111	0.0919325	0.25	No significant
D08:7083150	GH_D08G0616	0.666667	0.866845	0.727273	No significant
D08:7137638	GH_D08G0624	/	0.770116	/	No significant
D08:8562893	GH_D08G0687	/	0.233079	/	No significant
D08:9241259	GH_D08G0713	0.417455	0.058072	0.533333	No significant
D08:13377517	GH_D08G0851	0.175796	0.216216	1	No significant
D08:15951626	GH_D08G0894	0.585714	0.363976	0.646798	No significant
D08:15951626	GH_D08G0895	0.132468	0.91209	0.0408867	Significant
D08:16803725	GH_D08G0913	0.129859	0.226919	0.927784	No significant
D08:33566719	GH_D08G1131	0.256684	0.65064	1	No significant
D08:34067344	GH_D08G1143	0.0465116	0.803383	1	Significant
D08:35406118	GH_D08G1173	0.292683	/	/	No significant
D08:36006478	GH_D08G1179	0.26087	0.608696	1	No significant
D08:37517601	GH_D08G1190	/	0.433333	/	No significant
D08:45569742	GH_D08G1388	0.456939	0.625	1	No significant
D08:45569742	GH_D08G1389	0.0414286	0.75	0.5	Significant
D08:45636357	GH_D08G1391	/	0.524301	/	No significant
D08:45636368	GH_D08G1391	/	0.679063	/	No significant
D08:47581373	GH_D08G1459	0.663746	0.322581	0.571429	No significant
D08:50738822	GH_D08G1563	0.210526	0.789474	1	No significant
D08:51506911	GH_D08G1597	0.867868	0.126126	0.333333	No significant
D08:54544797	GH_D08G1751	0.463351	0.831918	0.342857	No significant
D08:55366326	GH_D08G1774	0.427441	0.268293	0.571429	No significant
D08:56270125	GH_D08G1819	0.235294	0.554955	0.4	No significant
D08:56270179	GH_D08G1819	0.545455	0.268975	0.4	No significant
D08:56671245	GH_D08G1840	0.0413702	0.363636	1	Significant
D08:60159430	GH_D08G2038	0.296623	0.832083	1	No significant
D08:60711089	GH_D08G2066	0.347059	0.8671	0.571429	No significant
D08:60718669	GH_D08G2068	0.769231	0.21526	0.8	No significant
D08:61418711	GH_D08G2123	0.761905	0.281885	0.222222	No significant
D08:61873005	GH_D08G2166	0.521739	0.475068	0.533333	No significant
D08:62733376	GH_D08G2233	0.521042	0.764161	0.207933	No significant
D08:63064458	GH_D08G2259	0.425616	0.407755	1	No significant
D08:63089901	GH_D08G2261	0.25	0.35122	0.666667	No significant
D08:63100835	GH_D08G2262	0.307692	0.0924623	1	No significant
D08:63627492	GH_D08G2291	0.319729	0.564466	0.232967	No significant
D08:63945490	GH_D08G2314	0.625	0.44219	0.5	No significant
D08:64158958	GH_D08G2333	0.941176	0.10028	0.5	No significant
D08:64564505	GH_D08G2377	0.705882	0.95464	1	No significant
D08:64687974	GH_D08G2381	0.142857	0.306614	0.133333	No significant
D08:65623743	GH_D08G2480	0.823529	0.0571429	0.5	No significant
D08:65833754	GH_D08G2501	0.837001	0.0645591	1	No significant
D08:67479122	GH_D08G2675	0.353171	0.0851942	0.0132716	Significant
D08:67684315	GH_D08G2694	0.228571	0.200499	0.263736	No significant
D08:68836226	GH_D08G2833	0.294118	0.427639	0.444444	No significant
D09:2528488	GH_D09G0111	/	0.8955	/	No significant
D09:3161877	GH_D09G0145	0.702208	0.200856	0.303696	No significant
D09:3899263	GH_D09G0172	0.493359	0.837757	1	No significant
D09:5845306	GH_D09G0221	0.35953	0.186806	/	No significant
D09:6060381	GH_D09G0228	0.55	0.577352	0.5	No significant
D09:6497005	GH_D09G0257	0.918919	0.777778	0.666667	No significant
D09:16421867	GH_D09G0494	0.126428	0.976995	0.333333	No significant
D09:26133418	GH_D09G0639	/	0.945487	/	No significant
D09:26165465	GH_D09G0641	0.350464	0.901411	0.276986	No significant
D09:27146370	GH_D09G0661	/	0.590909	/	No significant
D09:27571921	GH_D09G0673	/	0.897777	/	No significant
D09:30069411	GH_D09G0744	0.723598	0.154349	0.342857	No significant
D09:34532758	GH_D09G0975	0.434783	0.206691	0.461538	No significant
D09:35949981	GH_D09G1059	0.322866	0.833977	0.263119	No significant
D09:36165859	GH_D09G1067	0.421053	0.192308	0.5	No significant
D09:36880125	GH_D09G1123	/	0.480627	/	No significant
D09:38467357	GH_D09G1238	0.392812	0.610994	0.8	No significant
D09:38700295	GH_D09G1251	0.251275	0.607358	0.539461	No significant
D09:39326408	GH_D09G1300	0.486486	0.682788	1	No significant
D09:39940110	GH_D09G1343	/	0.285714	/	No significant
D09:40236720	GH_D09G1365	0.0687516	0.862239	0.547619	No significant
D09:40608403	GH_D09G1389	0.614286	0.576759	1	No significant
D09:41166494	GH_D09G1440	/	0.0658014	/	No significant
D09:41211555	GH_D09G1443	/	0.410256	/	No significant
D09:41250783	GH_D09G1447	0.958024	0.288188	0.455806	No significant
D09:42298353	GH_D09G1532	0.588235	0.924478	1	No significant
D09:42904564	GH_D09G1581	0.0144599	0.5	0.5	Significant
D09:43119396	GH_D09G1599	0.380952	0.348999	0.923077	No significant
D09:43274533	GH_D09G1614	1	0.830826	1	No significant
D09:43274533	GH_D09G1615	0.117647	0.0534119	0.333333	No significant
D09:43682700	GH_D09G1658	0.83651	0.225687	0.368132	No significant
D09:44220887	GH_D09G1719	0.838476	0.0802993	0.166667	No significant
D09:44531518	GH_D09G1752	0.0653191	0.203286	0.0285714	Significant
D09:44721453	GH_D09G1773	0.675676	0.186107	0.2	No significant
D09:46017698	GH_D09G1892	0.91954	0.423668	0.97094	No significant
D09:47369535	GH_D09G2035	0.340299	0.974041	0.263804	No significant
D09:47590619	GH_D09G2064	0.3083	0.24398	0.977694	No significant
D09:47798270	GH_D09G2096	0.9613	0.159895	0.543083	No significant
D09:47962474	GH_D09G2115	/	0.698752	/	No significant
D09:48089560	GH_D09G2129	0.3	0.712021	1	No significant
D09:48330885	GH_D09G2152	0.748663	0.799814	0.642857	No significant
D09:49300800	GH_D09G2281	/	0.47619	/	No significant
D09:51463050	GH_D09G2558	0.150697	0.8	0.5	No significant
D10:886655	GH_D10G0111	0.324337	0.192849	0.874237	No significant
D10:1488706	GH_D10G0179	0.380952	0.0768413	0.4	No significant
D10:1526337	GH_D10G0185	0.350301	0.565544	0.120588	No significant
D10:1866932	GH_D10G0239	/	0.387097	/	No significant
D10:1908258	GH_D10G0244	0.0511431	0.140095	0.157084	No significant
D10:2125411	GH_D10G0269	0.417959	/	/	No significant
D10:2339458	GH_D10G0299	0.883721	0.232558	1	No significant
D10:3010661	GH_D10G0378	/	0.490846	/	No significant
D10:3010661	GH_D10G0380	/	0.567951	/	No significant
D10:3138058	GH_D10G0395	0.746471	1	0.7	No significant
D10:3183714	GH_D10G0399	0.246963	0.813766	0.666667	No significant
D10:3641287	GH_D10G0451	/	0.787879	/	No significant
D10:4730975	GH_D10G0548	0.33822	0.0995249	0.0909627	No significant
D10:5050055	GH_D10G0571	/	0.430162	/	No significant
D10:5193061	GH_D10G0584	/	0.503337	/	No significant
D10:5521596	GH_D10G0614	0.262164	0.601824	0.0234748	Significant
D10:8798792	GH_D10G0833	0.725345	0.794964	1	No significant
D10:9209683	GH_D10G0854	0.313098	0.144629	0.599511	No significant
D10:10091405	GH_D10G0902	/	0.193708	/	No significant
D10:10426497	GH_D10G0922	0.652802	0.192192	0.285714	No significant
D10:11080718	GH_D10G0960	0.685714	0.649816	0.8	No significant
D10:11831288	GH_D10G1001	0.253202	0.302202	0.048951	Significant
D10:11895133	GH_D10G1004	0.305618	0.108195	0.2	No significant
D10:13122483	GH_D10G1075	/	0.111111	/	No significant
D10:16527036	GH_D10G1190	0.47619	0.784285	0.666667	No significant
D10:18280907	GH_D10G1258	/	0.175796	/	No significant
D10:18441439	GH_D10G1267	0.866208	0.781314	0.820452	No significant
D10:24853627	GH_D10G1470	/	0.322279	/	No significant
D10:25825795	GH_D10G1498	0.734143	0.356275	0.666667	No significant
D10:27208056	GH_D10G1533	0.674001	/	/	No significant
D10:31981194	GH_D10G1594	1	0.375578	1	No significant
D10:33325129	GH_D10G1631	/	0.844885	/	No significant
D10:47774657	GH_D10G1814	0.000467768	0.793258	0.0634921	Significant
D10:47959327	GH_D10G1828	0.631579	0.656305	1	No significant
D10:48491747	GH_D10G1841	/	0.615385	/	No significant
D10:52697201	GH_D10G1970	0.449198	0.980023	0.4	No significant
D10:52711658	GH_D10G1971	/	0.386429	/	No significant
D10:53154347	GH_D10G1981	0.472072	0.24453	1	No significant
D10:53304799	GH_D10G1988	/	0.688617	/	No significant
D10:55464604	GH_D10G2096	/	0.777778	/	No significant
D10:56199173	GH_D10G2140	0.210314	0.10023	0.266667	No significant
D10:56621304	GH_D10G2152	0.631579	/	/	No significant
D10:58300946	GH_D10G2244	/	0.257796	/	No significant
D10:58444849	GH_D10G2249	/	0.650647	/	No significant
D10:58641457	GH_D10G2263	0.223752	0.204652	0.164537	No significant
D10:59725998	GH_D10G2308	0.426862	0.340975	0.839161	No significant
D10:62844375	GH_D10G2493	0.237883	0.762311	0.304978	No significant
D10:63440403	GH_D10G2538	0.0349518	0.571035	0.533333	Significant
D10:66169754	GH_D10G2725	/	0.376471	/	No significant
D10:66565798	GH_D10G2763	0.0631579	0.0153414	0.491228	Significant
D11:362228	GH_D11G0041	0.918832	0.12637	1	No significant
D11:742369	GH_D11G0083	0.802241	0.41174	1	No significant
D11:828256	GH_D11G0093	0.840604	/	/	No significant
D11:1310297	GH_D11G0146	0.944444	0.50467	0.857143	No significant
D11:1310297	GH_D11G0147	0.111111	0.284476	0.285714	No significant
D11:1356360	GH_D11G0155	0.828477	0.809101	0.949717	No significant
D11:1397152	GH_D11G0163	/	0.541667	/	No significant
D11:1485821	GH_D11G0173	0.364672	0.815449	0.363636	No significant
D11:1703343	GH_D11G0201	0.705882	0.675894	0.75	No significant
D11:3204347	GH_D11G0409	0.45977	0.756669	0.363636	No significant
D11:3287422	GH_D11G0422	/	0.261045	/	No significant
D11:3380721	GH_D11G0432	0.487903	0.780741	0.581818	No significant
D11:4197622	GH_D11G0526	0.3	0.54878	0.666667	No significant
D11:4201041	GH_D11G0527	0.741026	0.102564	0.666667	No significant
D11:4664509	GH_D11G0573	0.829268	0.146341	1	No significant
D11:5265315	GH_D11G0647	/	0.197502	/	No significant
D11:5995771	GH_D11G0739	0.607524	0.947159	0.439492	No significant
D11:6040751	GH_D11G0745	0.884818	0.578947	0.5	No significant
D11:6066177	GH_D11G0749	0.872506	0.951332	0.730159	No significant
D11:6475407	GH_D11G0804	/	0.937452	/	No significant
D11:6912909	GH_D11G0852	0.390244	0.804959	0.5	No significant
D11:7439289	GH_D11G0910	0.198084	0.111498	1	No significant
D11:8426022	GH_D11G1011	/	0.531286	/	No significant
D11:9195107	GH_D11G1075	0.577778	0.457143	1	No significant
D11:9286884	GH_D11G1083	0.588235	0.789843	0.444444	No significant
D11:9465017	GH_D11G1092	0.205128	0.25272	1	No significant
D11:10682637	GH_D11G1210	/	0.677856	/	No significant
D11:10817398	GH_D11G1226	0.411765	0.868923	0.4	No significant
D11:11358319	GH_D11G1267	0.750336	0.844529	0.880791	No significant
D11:11707665	GH_D11G1299	0.181818	0.760929	0.75	No significant
D11:13166893	GH_D11G1421	0.926829	/	/	No significant
D11:13555926	GH_D11G1441	0.134601	0.867335	0.140865	No significant
D11:13555926	GH_D11G1442	0.454049	0.482225	0.158419	No significant
D11:13573241	GH_D11G1443	1	0.00560444	0.305124	Significant
D11:14345491	GH_D11G1514	0.0793651	0.495238	0.666667	No significant
D11:15436005	GH_D11G1601	0.832512	0.262578	0.581818	No significant
D11:15654587	GH_D11G1615	0.730949	0.0400813	0.516667	Significant
D11:19223354	GH_D11G1831	0.629032	0.610296	0.4	No significant
D11:19267979	GH_D11G1836	0.594795	1	1	No significant
D11:21729812	GH_D11G1972	/	0.985926	/	No significant
D11:22325369	GH_D11G1990	/	0.0969886	/	No significant
D11:23870541	GH_D11G2040	0.376935	0.722896	0.428571	No significant
D11:26063847	GH_D11G2123	1	0.825911	0.666667	No significant
D11:32382119	GH_D11G2286	/	0.0378994	/	Significant
D11:32382120	GH_D11G2286	/	0.827687	/	No significant
D11:33618934	GH_D11G2309	/	0.811073	/	No significant
D11:47005182	GH_D11G2488	/	0.472077	/	No significant
D11:51175385	GH_D11G2600	0.205128	0.143858	0.4	No significant
D11:56530180	GH_D11G2796	0.0591133	0.292925	0.102564	No significant
D11:56625649	GH_D11G2800	/	0.333691	/	No significant
D11:58363157	GH_D11G2884	0.870173	0.0867149	0.4	No significant
D11:58800953	GH_D11G2903	0.594595	0.419105	0.8	No significant
D11:59667254	GH_D11G2946	0.166667	0.246799	0.5	No significant
D11:60606072	GH_D11G3006	/	0.388664	/	No significant
D11:61672053	GH_D11G3075	0.787746	1	1	No significant
D11:66928712	GH_D11G3412	/	0.0417551	/	Significant
D11:68107088	GH_D11G3498	0.670078	0.116749	0.114286	No significant
D11:68145906	GH_D11G3501	0.395385	0.70487	0.478947	No significant
D11:68692930	GH_D11G3544	0.491827	0.695301	0.686791	No significant
D11:69735571	GH_D11G3613	0.0555556	/	/	No significant
D11:69735621	GH_D11G3613	0.384615	0.919218	0.666667	No significant
D11:70353819	GH_D11G3664	0.109091	0.0327486	0.978031	Significant
D11:70384854	GH_D11G3669	0.185014	0.312673	0.666667	No significant
D11:70674231	GH_D11G3700	0.888889	1	0.662069	No significant
D11:70674243	GH_D11G3700	0.888889	0.951799	0.662069	No significant
D12:492223	GH_D12G0032	0.91954	0.484985	0.49697	No significant
D12:492486	GH_D12G0032	0.470588	0.566388	1	No significant
D12:759225	GH_D12G0059	0.894737	0.0809717	0.666667	No significant
D12:1044074	GH_D12G0084	0.943715	0.79531	0.7	No significant
D12:1337009	GH_D12G0111	0.527029	0.557523	0.377289	No significant
D12:1757182	GH_D12G0143	0.944444	0.109046	0.666667	No significant
D12:2441001	GH_D12G0197	0.0587029	0.231046	0.404331	No significant
D12:2483059	GH_D12G0200	/	0.354334	/	No significant
D12:3294938	GH_D12G0252	0.857591	0.71977	0.876263	No significant
D12:4176580	GH_D12G0318	0.329743	0.831918	0.352381	No significant
D12:4830593	GH_D12G0356	0.25584	0.0367286	0.727273	Significant
D12:5845366	GH_D12G0415	0.529412	0.640365	0.363636	No significant
D12:6903232	GH_D12G0474	0.914286	0.609952	1	No significant
D12:7156454	GH_D12G0483	1	0.708812	1	No significant
D12:8081202	GH_D12G0528	0.495238	0.0571429	0.666667	No significant
D12:8310055	GH_D12G0539	/	0.97561	/	No significant
D12:9155349	GH_D12G0564	/	0.0122803	/	Significant
D12:10529054	GH_D12G0631	0.540225	0.677246	0.808081	No significant
D12:10529061	GH_D12G0631	0.386991	0.779609	0.530303	No significant
D12:22208064	GH_D12G0858	0.833333	0.833333	1	No significant
D12:25229219	GH_D12G0893	0.0105534	0.305983	0.047619	Significant
D12:30297123	GH_D12G0996	0.433333	0.822483	0.512821	No significant
D12:30706861	GH_D12G1008	0.434976	0.256135	0.228571	No significant
D12:31544605	GH_D12G1019	0.773434	0.650405	0.925616	No significant
D12:35080334	GH_D12G1076	/	0.933333	/	No significant
D12:38968628	GH_D12G1216	0.472072	0.955864	0.714286	No significant
D12:40202127	GH_D12G1293	0.449198	0.848616	0.481818	No significant
D12:40224856	GH_D12G1295	0.657279	0.710844	0.573247	No significant
D12:40763571	GH_D12G1318	/	0.813362	/	No significant
D12:44931959	GH_D12G1558	0.35902	0.718732	0.2	No significant
D12:45192347	GH_D12G1573	1	0.0606094	0.350301	No significant
D12:46169584	GH_D12G1620	0.315789	0.25789	0.4	No significant
D12:47263992	GH_D12G1681	0.207419	0.594595	0.4	No significant
D12:47495510	GH_D12G1691	0.542939	0.967742	0.923077	No significant
D12:47556974	GH_D12G1695	0.540804	0.268293	0.380952	No significant
D12:48253676	GH_D12G1728	/	0.0444444	/	Significant
D12:49701009	GH_D12G1843	/	0.186496	/	No significant
D12:50869382	GH_D12G1919	/	0.55749	/	No significant
D12:51273828	GH_D12G1945	0.013289	0.203447	0.111111	Significant
D12:51273832	GH_D12G1945	0.013289	0.606973	0.190476	Significant
D12:54655133	GH_D12G2223	0.816817	0.048048	0.333333	Significant
D12:54710685	GH_D12G2230	0.830805	0.933901	0.583435	No significant
D12:54899688	GH_D12G2246	0.0512821	0.4	0.666667	No significant
D12:55317463	GH_D12G2285	0.266667	0.811594	0.666667	No significant
D12:55510476	GH_D12G2301	/	0.708415	/	No significant
D12:55596328	GH_D12G2310	0.521042	0.0760184	0.403281	No significant
D12:55943561	GH_D12G2347	/	0.274911	/	No significant
D12:56182699	GH_D12G2374	0.145455	0.409091	0.666667	No significant
D12:56335528	GH_D12G2386	0.403706	0.441439	0.807531	No significant
D12:56920150	GH_D12G2440	/	0.810371	/	No significant
D12:58313340	GH_D12G2596	0.309797	0.37653	0.798039	No significant
D12:58757105	GH_D12G2654	/	0.606061	/	No significant
D12:58980252	GH_D12G2684	/	0.0541457	/	No significant
D12:59020671	GH_D12G2688	/	7.72e-05	/	Significant
D12:59188171	GH_D12G2707	0.40267	0.55761	0.8	No significant
D12:59201226	GH_D12G2710	/	0.123671	/	No significant
D12:59425802	GH_D12G2731	0.95396	0.941653	0.785714	No significant
D12:59906619	GH_D12G2783	0.640114	0.671627	0.4	No significant
D12:60562869	GH_D12G2864	0.859567	0.823285	0.383333	No significant
D12:60665881	GH_D12G2877	0.555559	0.951928	0.760907	No significant
D13:1135676	GH_D13G0133	/	0.388529	/	No significant
D13:1498205	GH_D13G0179	1	0.611111	0.666667	No significant
D13:1590209	GH_D13G0188	0.0851064	0.966607	0.285714	No significant
D13:1758468	GH_D13G0199	0.0327786	0.500875	0.0363636	Significant
D13:1989343	GH_D13G0222	0.597794	0.721841	0.954645	No significant
D13:2874341	GH_D13G0308	0.717241	0.565556	0.581818	No significant
D13:5306324	GH_D13G0470	0.146326	0.834828	0.230303	No significant
D13:6582744	GH_D13G0539	0.129032	0.416422	1	No significant
D13:7536181	GH_D13G0587	0.283077	0.0486852	0.958824	Significant
D13:37600498	GH_D13G1199	0.497391	0.684717	0.415789	No significant
D13:37986812	GH_D13G1208	0.867275	0.411727	0.537117	No significant
D13:40326415	GH_D13G1282	0.386991	0.191255	0.0937729	No significant
D13:42694211	GH_D13G1350	1	0.864322	1	No significant
D13:45087215	GH_D13G1402	0.943789	0.105685	0.333315	No significant
D13:46685236	GH_D13G1450	1	0.480797	0.666667	No significant
D13:49733517	GH_D13G1559	0.454545	0.612385	1	No significant
D13:50187718	GH_D13G1584	0.496443	0.238485	0.0624355	No significant
D13:50313066	GH_D13G1592	0.54484	0.03	0.102604	Significant
D13:52972841	GH_D13G1725	0.860918	/	/	No significant
D13:53937467	GH_D13G1770	/	0.947387	/	No significant
D13:56276839	GH_D13G1875	/	0.81578	/	No significant
D13:57155248	GH_D13G1935	0.231679	0.594287	0.425849	No significant
D13:58688812	GH_D13G2073	0.478947	0.901624	0.610714	No significant
D13:59590762	GH_D13G2154	0.744436	0.427369	0.367677	No significant
D13:60022826	GH_D13G2194	/	0.203298	/	No significant
D13:60265936	GH_D13G2214	/	0.73913	/	No significant
D13:61763412	GH_D13G2345	0.363636	0.215401	0.3	No significant
D13:62687055	GH_D13G2440	/	0.269559	/	No significant
D13:63045385	GH_D13G2488	0.943715	0.538462	1	No significant
D13:63771436	GH_D13G2541	0.284495	0.189299	0.4	No significant
D13:64174963	GH_D13G2593	0.390244	0.490846	0.75	No significant
D13:64263194	GH_D13G2607	/	0.162055	/	No significant
0|0: Genotype homozygous, reference type
1|1: Genotype homozygous, alternate type
0|1: Genotype heterozygous
